# Supplementary material for: Synthesis, Characterization and Antibacterial Efficacy of Catharanthus roseus and Ocimum tenuiflorum-Mediated Silver Nanoparticles: Phytonanotechnology in Disease Management
Source: MDPI journal article supplement (doi:10.3390/pr11051479), 2023-05-12
Supplement: s1 [file s1]

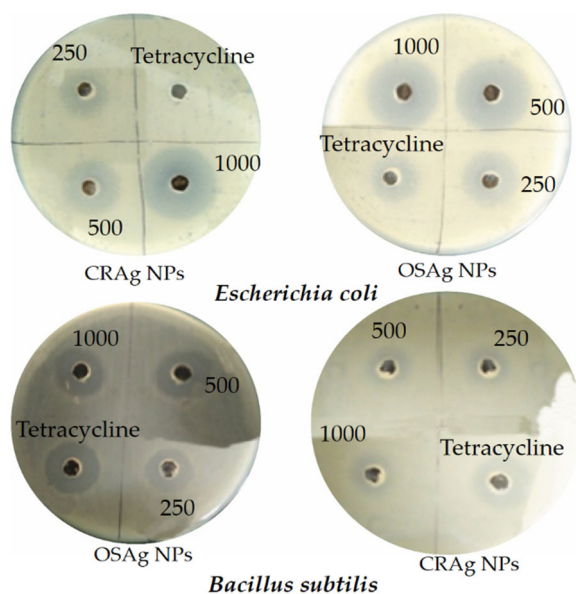

**Figure S1.** Antibacterial activity of *C. roseus* and *O. tenuiflorum* mediated Ag NPs. OSAg NPs: *O. tenuiflorum* mediated Ag NPs; CRAg NPs: *C. roseus* mediated Ag NPs; 250, 500 & 1000 is conc. in µg/mL.
